# Supplementary material
Source: PubMed Central journal article supplement (PMC7179960)
Supplement: NEJMc2005696_appendix.pdf [file NEJMc2005696_appendix.pdf]

## Supplementary Appendix

This appendix has been provided by the authors to give readers additional information about their work.

Supplement to: Zhan M, Qin Y, Xue X, Zhu S. Death from Covid-19 of 23 health care workers in China. *N Engl J Med*. DOI: 10.1056/NEJMc2005696

## Supplementary Appendix

This appendix has been provided by the authors to give readers additional information about their work.

Supplement to: M. Zhan, Y. Qin, X. Xue, et al. Death from Covid-19 among 23 Health Care Workers in China

| Variable               | Characteristic |     |            |                                                  |                         |                    |                                      |                                         |                                                |                     |
|------------------------|----------------|-----|------------|--------------------------------------------------|-------------------------|--------------------|--------------------------------------|-----------------------------------------|------------------------------------------------|---------------------|
| Health care worker No. | Age (yr)       | Sex | Death date | Duration from hospital admission to death (days) | Hospital admission date | Symptom onset date | City of health care worker worked in | Department health care worker worked in | Level of hospital health care worker worked in | Hospital transfer † |
| 1                      | 60             | M   | 1/25       | 9                                                | 1/16                    | 1/16               | Wuhan in Hubei province              | ENT                                     | Tertiary comprehensive hospital                | Yes                 |
| 2                      | 57             | M   | 1/28       | 5                                                | 1/23                    | NA                 | Jingmen in Hubei province            | Internal medicine                       | Secondary hospital                             | Yes                 |
| 3                      | 38             | F   | 1/30       | 1                                                | 1/30                    | 1/17               | Tianmen in Hubei province            | Chinese rehabilitation medicine         | Tertiary comprehensive hospital                | No                  |
| 4                      | 71             | M   | 2/4        | 5                                                | 1/31                    | 1/24               | Wuhan                                | Family medicine                         | Community health center                        | No                  |
| 5                      | 34             | M   | 2/7        | 26                                               | 1/12                    | 1/10               | Wuhan                                | Ophthalmology                           | Tertiary comprehensive hospital                | No                  |
| 6                      | 49             | M   | 2/8        | 13                                               | 1/26                    | 1/18               | Wuhan                                | General surgery                         | Secondary hospital                             | Yes                 |
| 7                      | 62             | M   | 2/10       | 14                                               | 1/27                    | Before 1/24        | Wuhan                                | Organ transplantation                   | Tertiary comprehensive hospital                | No                  |
| 8                      | 51             | M   | 2/10       | 8                                                | 2/ 2                    | NA                 | Wuhan                                | Family medicine                         | Community health center                        | NA                  |
| 9                      | 69             | F   | 2/11       | 27                                               | 1/15                    | NA                 | Wuhan                                | Electrocardiograph                      | Tertiary                                       | NA                  |

|    |    |   |      |    |      |      |                            |                                         |                                 |     |
|----|----|---|------|----|------|------|----------------------------|-----------------------------------------|---------------------------------|-----|
|    |    |   |      |    |      |      |                            | y technician                            | comprehensive hospital          |     |
| 10 | 66 | M | 2/11 | 8  | 2/3  | 1/23 | Wuhan                      | Family medicine                         | Private clinic                  | Yes |
| 11 | 69 | M | 2/13 | 9  | 2/4  | 1/26 | Ezhou in Hubei province    | Chinese medicine                        | Tertiary comprehensive hospital | NA  |
| 12 | 59 | F | 2/14 | 7  | 2/7  | 2/6  | Wuhan                      | Nurse                                   | Community health center         | NA  |
| 13 | 67 | F | 2/14 | 9  | 2/5  | 1/23 | Wuhan                      | Family medicine                         | Community health center         | No  |
| 14 | 51 | M | 2/18 | 27 | 1/22 | 1/19 | Wuhan                      | Hospital Dean and Neurosurgery          | Tertiary comprehensive hospital | Yes |
| 15 | 72 | F | 2/18 | 17 | 2/1  | 1/27 | Wuhan                      | Family medicine                         | Private clinic                  | NA  |
| 16 | 29 | M | 2/20 | 26 | 1/25 | 1/23 | Wuhan                      | Respiratory and intensive care medicine | Tertiary comprehensive hospital | Yes |
| 17 | 29 | F | 2/23 | 35 | 1/19 | 1/19 | Wuhan                      | Gastroenterology                        | Secondary hospital              | Yes |
| 18 | 42 | M | 2/23 | 25 | 1/29 | 1/26 | Xiaogan in Hubei province  | Respiratory medicine                    | Tertiary comprehensive hospital | No  |
| 19 | 55 | M | 2/23 | 32 | 1/22 | 1/18 | Danzhou in Hainan province | Internal medicine                       | Secondary hospital              | Yes |
| 20 | 65 | M | 2/27 | 22 | 2/5  | 1/26 | Wuhan                      | Chinese medicine                        | Tertiary comprehensive hospital | Yes |
| 21 | 55 | M | 3/1  | 43 | 1/17 | 1/17 | Wuhan                      | Thyroid surgery                         | Tertiary comprehensive hospital | Yes |
| 22 | 57 | M | 3/3  | 47 | 1/15 | 1/13 | Wuhan                      | Ophthalmology                           | Tertiary comprehensive hospital | Yes |

|                                                                                                                                                                                                                                                                                                                                                                                                                                                                                                                                                                                                                                                                                                                                                                                                                                                                                                                                                                                                                                                                                                                                                                                                                                                                                                                                                                                                                                                                                                                                                                                          |    |   |     |    |      |     |       |               |                                 |     |
|------------------------------------------------------------------------------------------------------------------------------------------------------------------------------------------------------------------------------------------------------------------------------------------------------------------------------------------------------------------------------------------------------------------------------------------------------------------------------------------------------------------------------------------------------------------------------------------------------------------------------------------------------------------------------------------------------------------------------------------------------------------------------------------------------------------------------------------------------------------------------------------------------------------------------------------------------------------------------------------------------------------------------------------------------------------------------------------------------------------------------------------------------------------------------------------------------------------------------------------------------------------------------------------------------------------------------------------------------------------------------------------------------------------------------------------------------------------------------------------------------------------------------------------------------------------------------------------|----|---|-----|----|------|-----|-------|---------------|---------------------------------|-----|
| 23                                                                                                                                                                                                                                                                                                                                                                                                                                                                                                                                                                                                                                                                                                                                                                                                                                                                                                                                                                                                                                                                                                                                                                                                                                                                                                                                                                                                                                                                                                                                                                                       | 67 | M | 3/9 | 19 | 2/18 | 2/3 | Wuhan | Ophthalmology | Tertiary comprehensive hospital | Yes |
| <p>* Covid-19 denotes coronavirus disease 2019, NA not available.</p> <p>† All 23 health care workers were infected with SARS-CoV2 in practice and died from Covid-19. The infections and the deaths were confirmed either by their own medical institutions or by hospitals where they received treatment. With the confirmation from the institutions, 14 of the 23 health care workers had been included in the list of advanced individuals in the National Health System for excellent work in the prevention and control of Covid-19 on the official website of National Health Commission of the People's Republic of China on Mar 5, 2020.<sup>1</sup> Likewise, 13 of the 14 health care workers and another 8 were qualified as beneficiaries of Chinese Red Cross Foundation and ByteDance Humanitarian Relief Fund for Health Care Workers, and each of their families received RMB 1 million yuan, as of April 3, 2020.<sup>2,3</sup> The last one (Health care worker No.10) of the 23 health care workers was reported in great detail.<sup>4-6</sup> For these 23 cases, most of their post-infection experiences were reported by the ByteDance-operated mobile app Toutiao and other professional, social media.<sup>4-7</sup> We further confirmed some missing clinic characteristics by phone interviews with their colleagues or relatives.</p> <p>‡ The health care workers were transferred from the first admission hospitals to more specialized ICUs in other hospitals or to hospitals specializing in infectious diseases after condition deterioration</p> |    |   |     |    |      |     |       |               |                                 |     |

1. National Health Commission of the People's Republic of China. Decision of awarding advanced groups and individuals in the National Health System for excellent work in the prevention and control of Covid-19. March 5, 2020 (<http://www.nhc.gov.cn/xcs/zhengcwj/202003/28cc60d7e33b4dc7bd77af485fab1a58.shtml>).
2. Chinese Red Cross Foundation. 91 health care workers were funded by Chinese Red Cross Foundation and ByteDance Humanitarian Relief Fund for Health Care Workers in the 65th batch. April 3, 2020. (In Chinese) (<https://new.crcf.org.cn/article/20099>).
3. ByteDance Humanitarian Relief Fund for Health Care Workers. The 65th batch of funding list announcement by ByteDance Humanitarian Relief Fund for Health Care Workers. April 3, 2020. (In Chinese) (<https://www.toutiao.com/i6811475804208235012/>).
4. Pear videos. The Deceased Liao Qingxu-Last moment of life. March 14, 2020 ([https://www.pearvideo.com/video\\_1661327](https://www.pearvideo.com/video_1661327))
5. Weixin. A Wuhan clinic doctor to be included in the list of martyrs released by Chinese authorities. March 7, 2020 (<https://mp.weixin.qq.com/s/v-6AXhUiVWVXoYYuQ-E6bA>).
6. Primary health. Mourning on 61 health care workers. April 4, 2020 ([https://mp.weixin.qq.com/s/\\_YxXGfkMB7Tord9yOHqccQ](https://mp.weixin.qq.com/s/_YxXGfkMB7Tord9yOHqccQ)).
7. Hubei Provincial Peoples Government. Fourteen frontline workers who lost their lives fighting COVID-19 were honored as martyrs. April 2, 2020 ([http://www.xinhuanet.com/politics/2020-04/02/c\\_1125806371.htm](http://www.xinhuanet.com/politics/2020-04/02/c_1125806371.htm)).
